# Supplementary material
Source: PubMed Central journal article supplement (PMC2777519)

## **Supplemental Data**

### **Heterozygous Embryonic Stem Cell Lines Derived from Primate Parthenotes**

Vikas Dighe, Lisa Clepper, Darlene Pedersen, James Byrne, Betsy Ferguson, Sumita Gokhale, M. Cecilia T. Penedo,  
Don Wolf and Shoukhrat Mitalipov

## **Supplemental Tables**

Supplemental Table 1. Primer sequences, product size, and Tm for RT-PCRs and qPCRs

| IMPRINTED GENES              |                                  |                                 |                          |    |
|------------------------------|----------------------------------|---------------------------------|--------------------------|----|
| GENE                         | 5' PRIMER                        | 3' PRIMER                       | bp                       | Tm |
| <i>TP73</i>                  | ACTTCGAGGTCACCTTCCAGCAGT         | TATTGCCTTCCACACGGATGAGGT        | 285                      | 60 |
| <i>PPP1R9A</i>               | TAAGACCACCTGTCTGTGGAAACA         | GTTTGCCAGTGTGCTGAGATGCT         | 317                      | 60 |
| <i>DLX5</i>                  | ACCATCCTTCTCAGGAATCGCCAA         | TGTGTTTGTGTCAATCCCAGCGAG        | 457                      | 60 |
| <i>CPA4</i>                  | TCTCTTCCACCTTCAATCGGCCT          | CAGGAAAGTCTGCGGCAATGTTGT        | 259                      | 56 |
| <i>CDKN1C</i>                | AGCACATCTACGATGGAGCGTCTT         | AGTCGCTGTCCACTTCGGTCCACT        | 235                      | 60 |
| <i>SLC22A18</i>              | GCCACTTCTCGGAGGAGGTGCT           | GGAGCAGTGGTTGTACAGAGGCG         | 230                      | 55 |
| <i>GNAS</i>                  | ATGGTGAGAAGGCAACCAAGTGC          | GAAGGTGCATGCGCTGAATGATGT        | 912                      | 60 |
| <i>UBE3A</i>                 | ATGCACCTGTCCGGCTAGAGATGA         | AGCCAGACCCAGTACTATGCCAAT        | 263                      | 60 |
| <i>ATP10A</i>                | AACCGGCTCAAGACCACCAAGTA          | TGTAGTCCTCCCATAGGTCCCTGAA       | 211                      | 60 |
| <i>PHLDA2</i>                | CTTCCAGCTATGGAAGAAGAAGCG         | CGGCGGTTCTGGAATTCGATGA          | 255                      | 55 |
| <i>H19</i>                   | AGCTAGAGGAACCAGACCTCATCA         | ATGGAATGCTTGAAGGTTGCC           | 525                      | 62 |
| <i>PEG3</i>                  | TCGCTGAGGACAGGAAACCT             | ACTCCCTTGCTCTTCCCGAT            | 303                      | 56 |
| <i>MAGEL2</i>                | TAAAGAGCGCAGGACCTCCTCAA          | TGCCTTTGAGGCATTCATGTTGGG        | 346                      | 60 |
| <i>MKRN3</i>                 | CGGCATTTGGACAAAGCAGATCA          | ATCACAGGCAAGGAAAGGGAGGAT        | 238                      | 60 |
| <i>MEST</i>                  | ATGGGATAACGCGGCCATGGTG           | TTCCAACCACCCACAGAGTCTT          | 218                      | 56 |
| <i>PEG10</i>                 | ACAACAACAACCTCCAAGCACACCG        | TCTGGGTTGCCATCGAACTTCTCT        | 322                      | 60 |
| <i>PLAGL1</i>                | GCCACGTTTCCCTGCCAATTATGT         | TCTCTTCCGCATGGGATTTGAGGT        | 433                      | 60 |
| <i>DIRAS3</i>                | TCCAACGATGGGTAACGTCAGTT          | TCCAGGGTTTCTTCTTGGTGACT         | 382                      | 60 |
| <i>SGCE</i>                  | TACCCATCAGCAGGTGTCTCTTT          | AGGTGCGCCTATTGTAGGCAGTTA        | 265                      | 60 |
| <i>ZIM2</i>                  | TGTACCAACCGGAAGACGACAACA         | TCGCCATCACAGGAAGGGAAAGAT        | 228                      | 60 |
| <i>IGF2</i>                  | CCAAAGTCCCGCTAAGATTCTCCA         | GCAAAGATGATCCCTAGGTGTGCT        | 471                      | 65 |
| <i>NDN</i>                   | GAGCCGCCGAATACGAGTT              | GCAGGAGCAGTCTACCCCAA            | 564                      | 60 |
| <i>SNPRN</i>                 | AGTTACTGTGGATGAGGGTGATGC         | CACCCAGGACCTTCCACTCATT          | 474                      | 58 |
| STEMNESS GENES               |                                  |                                 |                          |    |
| <i>OCT4</i>                  | TGGAGAAGGAGAAGCTGGAGCAAA         | GAAGCTAAGCTGCAGAGCCTCAA         | 212                      | 60 |
| <i>NANOG</i>                 | CAGAACTGTGTTCTTCCACCCA           | CGCTGATTAGGCTCCAACCATACT        | 801                      | 60 |
| <i>TDGF</i>                  | CATATTGGCCAGTCTGGTCTCGAA         | ATTCCTTCAGCACTCTGGTCTCTC        | 303                      | 60 |
| <i>TERT</i>                  | AGCTATGCCCGGACCTCCAT             | GCCTGCAGCAGGAGGATCTT            | 185                      | 60 |
| <i>LEFTYA</i>                | CCTGTGCTCTTCCATTTCCTGTCT         | AAGCCCTTCATCCTTCTCTTAGC         | 341                      | 60 |
| <i>SOX2</i>                  | CCCCCGCGGCAATAGCA                | TCGGCGCCGGGAGATACAT             | 448                      | 60 |
| CARDIAC GENES                |                                  |                                 |                          |    |
| <i>GAPDH</i>                 | GTGGTCTCTCCGACTTCAACA            | GTCTCTCTTCTCTTGTGCTCT           | 217                      | 61 |
| <i>Alpha-MHC</i>             | GTCATTGCTGAAACCGAGAATG           | GCAAAGTACTGGATGACACGCT          | 413                      | 61 |
| <i>hANP</i>                  | GAACCAGAGGGGAGAGACAGAG           | CCCTCAGCTTGCTTTTTAGGAG          | 406                      | 61 |
| <i>NKX2.5</i>                | TGGCTACAGCTGCACTGCCG             | GGATCCATGCAGCGTGGAC             | 167                      | 57 |
| <i>Mlc2a</i>                 | AAGGTGAAGTGTCCAGAGG              | ACAGAGTTTATTGAGGTGCC            | 377                      | 61 |
| <i>cTnT</i>                  | GGCAGCGGAAGAGGATGCTGAA           | GAGGCACCAAGTTGGGCATGAACGA       | 152                      | 64 |
| qPCR                         |                                  |                                 |                          |    |
| GENE                         | 5' PRIMER                        | 3' PRIMER                       | PROBE                    |    |
| <i>PLAGL1</i>                | AGTACAACACCATGCTGGGCTAT          | TGCTGGCCGCATGGA                 | AGAGGCACCTGGCC           |    |
| <i>SGCE</i>                  | ACCCAAAACCTGGCGAGAT              | TCCAGGTCGGTCTGGGTAAC            | AGTAATGATCCCATAACATT     |    |
| <i>SNRPN</i>                 | AAGCAACCAGAGCGTGAAGAA            | TCCCACGCAGCAACAC                | AGCGGGTTTTGGGTCT         |    |
| <i>H19</i>                   | CCTCCCCGACTCTGTTCC               | CACAACCTCAACCAGTGCAAA           | CCGTCCCTTCTGAATT         |    |
| <i>IGF2</i>                  | GTCGGCCAGCCAGAGT                 | CGGCTACCATCATCTCCATTG           | AGGAAGGAGTTTGCC          |    |
| <i>NECDIN</i>                | TGTCTCCGAGGACTAGCCAAGT           | GCCCTGGTGAGGATCAGAAA            | TGGAGGCAGATGAAT          |    |
| <i>UBE3A</i>                 | GAAGGAGAACAAGGAGTTGATGAAG        | CCTCCACAACCAGCTGAAAA            | AGGTGTTTTCAAAGAA         |    |
| <i>PEG10</i>                 | CCCTTCGAGAGCAAGTGGA              | GCGGAGCTCGATGTCATCAT            | CCACCCCTGAGGATG          |    |
| <i>GAPDH</i>                 | GGTGGTCTCTCCGACTTCA              | ACCAGGAAATGAGCTTGACAAAG         | CCCCTCTTCCACCTTCGACGCTG  |    |
| <i>DIRAS3</i>                | CGGCAACTTCCGTCATGAGT             | CCAGCAACTGGCAGTAGGTATTT         | CCTGCCGACCATTG           |    |
| <i>OCT4</i>                  | CCCCTGGTGCCGTGAA                 | TTGGCAAATTGCTCGAGTTCT           | GGACTCCTCCGGGTTTTGCTCCAG |    |
| BISULFITE SEQUENCING PRIMERS |                                  |                                 |                          |    |
| NAME                         | 5' PRIMER                        | 3' PRIMER                       | bp                       | Tm |
| <i>BIS H19</i>               | GAGGTGTTTTTATTTTTTGGATGAT        | ACTCCTAAATTAACATCTCAAACCTA<br>C | 637                      | 51 |
| <i>H19 SNP</i>               | CAGTTGTAGGTGTGGAATCAGAAGT<br>GGC | GTTAATGTCTGGCCACTTAGGGCT        | 845                      | 69 |

Supplemental Table 2. RT-PCR expression analysis of cardiac-specific genes in contracting aggregates derived from P ESCs (rP ESC lines) and a bi-parental control ESCs (ORMES-22)

| Gene              | Adult heart tissue | ORMES-22 undifferentiated | ORMES-22 cardiac differentiation | rP ESC-2 cardiac differentiation | rP ESC-3 cardiac differentiation | rP ESC-4 cardiac differentiation |
|-------------------|--------------------|---------------------------|----------------------------------|----------------------------------|----------------------------------|----------------------------------|
| <i>GAPDH</i>      | +                  | +                         | +                                | +                                | +                                | +                                |
| <i>ALPHA-MHC</i>  | +                  | -                         | +                                | +                                | +                                | -                                |
| <i>hANP</i>       | +                  | -                         | +                                | +                                | +                                | +                                |
| <i>NKX2.5</i>     | +                  | -                         | +                                | +                                | +                                | +                                |
| <i>TROPONIN T</i> | +                  | -                         | +                                | +                                | +                                | +                                |
| <i>MLC-2A</i>     | +                  | -                         | -                                | +                                | +                                | -                                |

Presence (+) or absence (-) of PCR cDNA products generated from probes for each gene

### Supplemental Figure legends

Supplemental Figure 1. Cytogenetic analysis of rhesus monkey P ESCs by G-banding demonstrating normal euploid karyotypes (42, XX) for rP ESC-2, -3, -4 and -5 that were indistinguishable from fertilized female rhesus karyotypes. G-banding analysis of rP ESC-1 revealed that the majority of analyzed cells (24/32) displayed cytogenetically normal XX female chromosome complement. However, remaining cells exhibited unbalanced chromosomal abnormalities: two of 32 analyzed cells were characterized by the presence of three copies of chromosome 18 and six cells were characterized by the presence of three copies of chromosomes 14 and 18. It is unclear at this point, whether these abnormalities were inherited from the parental embryo or occurred during ESC culture.

Supplemental Figure 2. Analysis of differentiation potential of rP ESC lines in teratomas. A: Cystic areas within a teratoma (x 40; H&E); B: Ectoderm-derived stratified squamous epithelium with some areas of keratinization (x100; H&E); C: Mesoderm-derived cartilage and bone (x 100; H&E); D: Endoderm-derived intestinal-type columnar epithelium (x 100; H&E); E: Immature neuroectodermal tissue (x 400; H&E); F-I: Muscle tissue (x100 and x400; H&E).

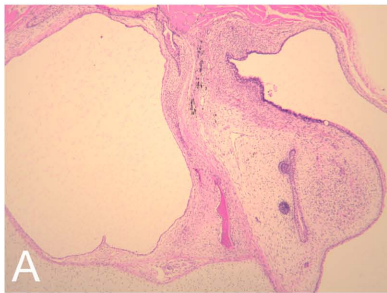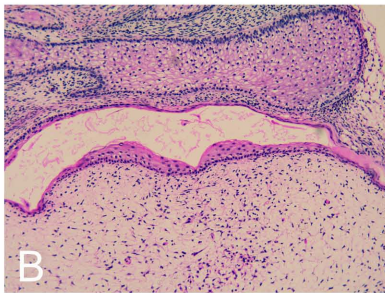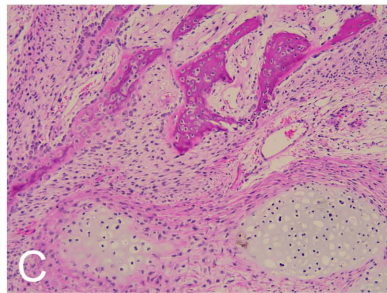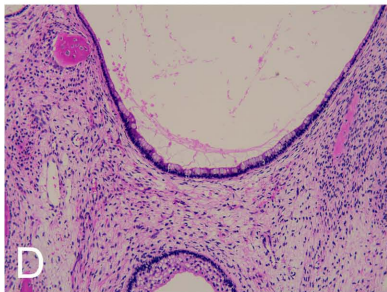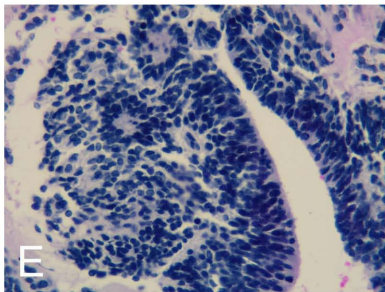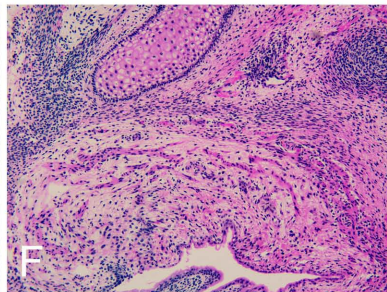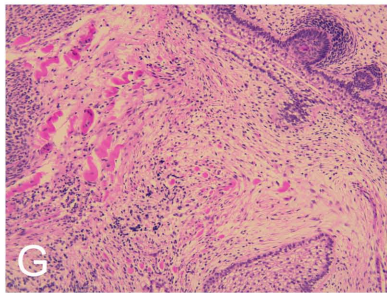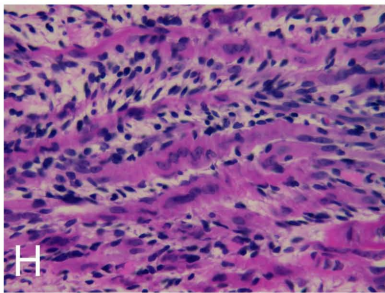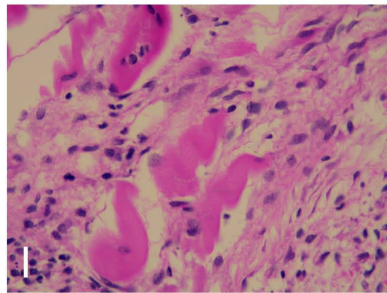

rPESC-1

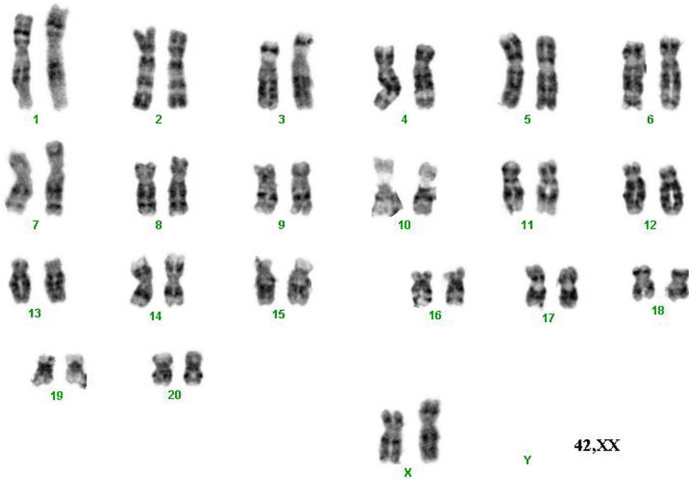

rPESC-1 trisomic

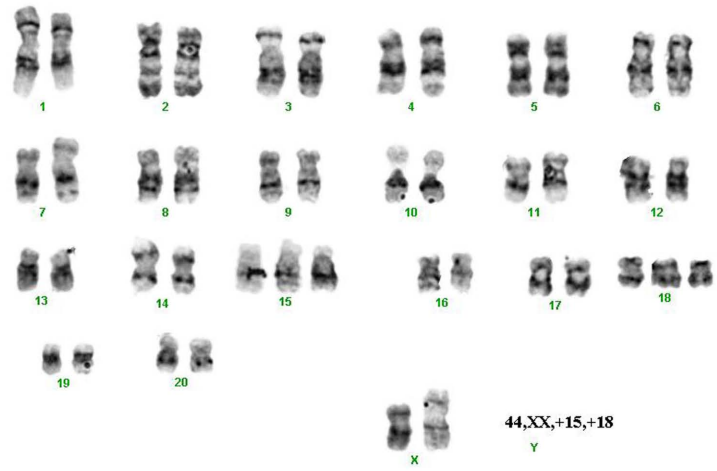

rPESC-2

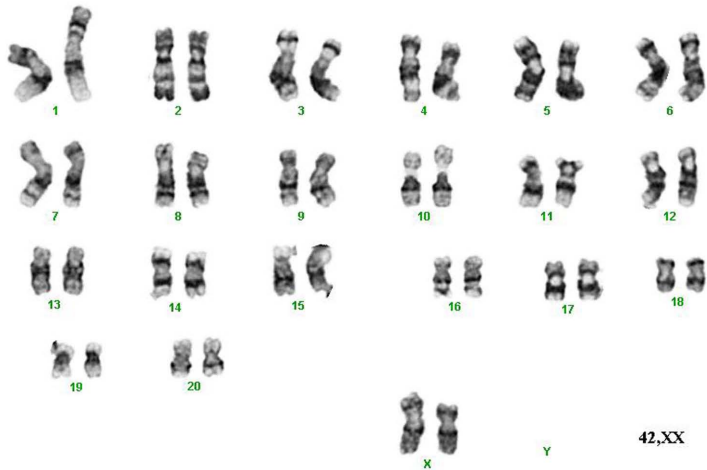

rPESC-3

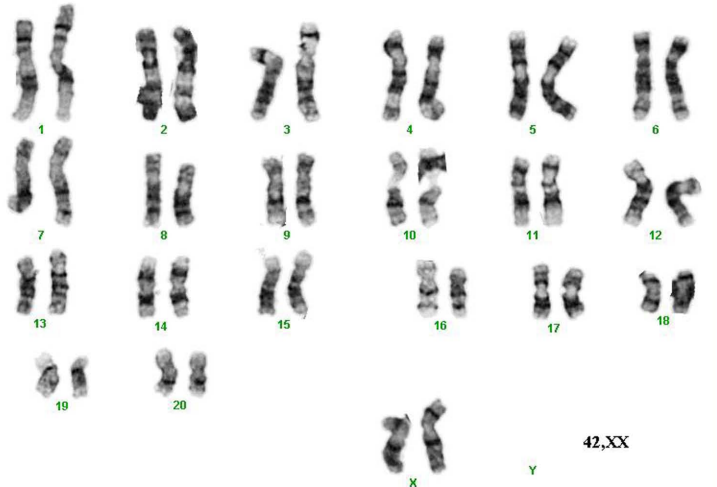

rPESC-4

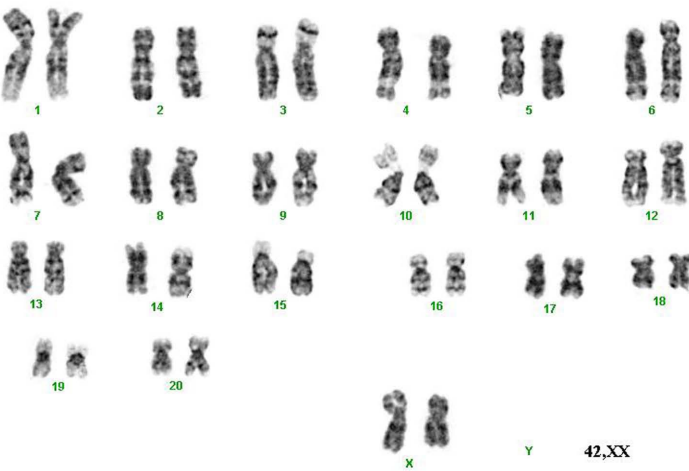

rPESC-5

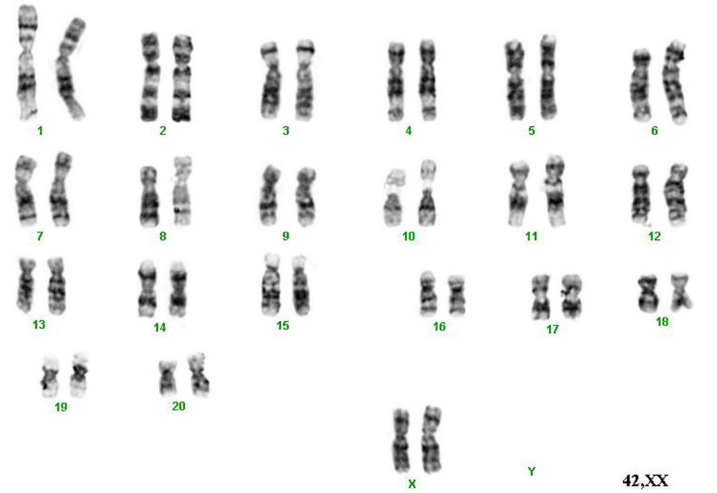

Supplement: NIHMS138196-supplement-01.pdf [file NIHMS138196-supplement-01.pdf]
